# Supplementary material for: Photo-response performance regulation of a type-Ib diamond-based photodetector by H2 annealing and ozone treatment
Source: Royal Society of Chemistry journal article supplement (doi:10.1039/d4tc05169f), 2025-01-01
Supplement: d4tc05169f1.pdf [file d4tc05169f1.pdf]

## Supplementary information

### **Photo-response performance regulation of type-Ib diamond-based photodetector by H<sub>2</sub> annealing and ozone treatment**

Keyun Gu<sup>1,2</sup>, Zilong Zhang<sup>2</sup>, Takeo Ohsawa<sup>2</sup>, Masataka Imura<sup>2</sup>, Jian Huang<sup>1\*</sup>, Yasuo Koide<sup>2</sup>, and Meiyong Liao<sup>2\*</sup>

<sup>1</sup> School of Materials Science and Engineering, Shanghai University, Shanghai 200444, China

<sup>2</sup> Research Center for Electronic and Optical Materials, National Institute for Materials Science (NIMS), Namiki 1-1, Tsukuba, Ibaraki 305-0044, Japan

\* Correspondence to: Meiyong Liao (meiyong.liao@nims.go.jp), and Jian Huang (jianhuang@shu.edu.cn)

## 1. The optical image of PD

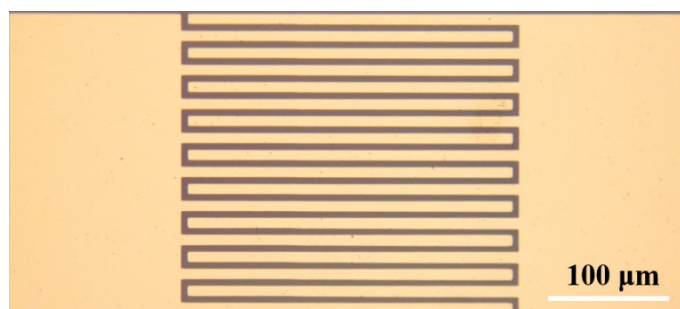

Figure S1. Optical image of PD.

## 2. The photo response stability of PDs

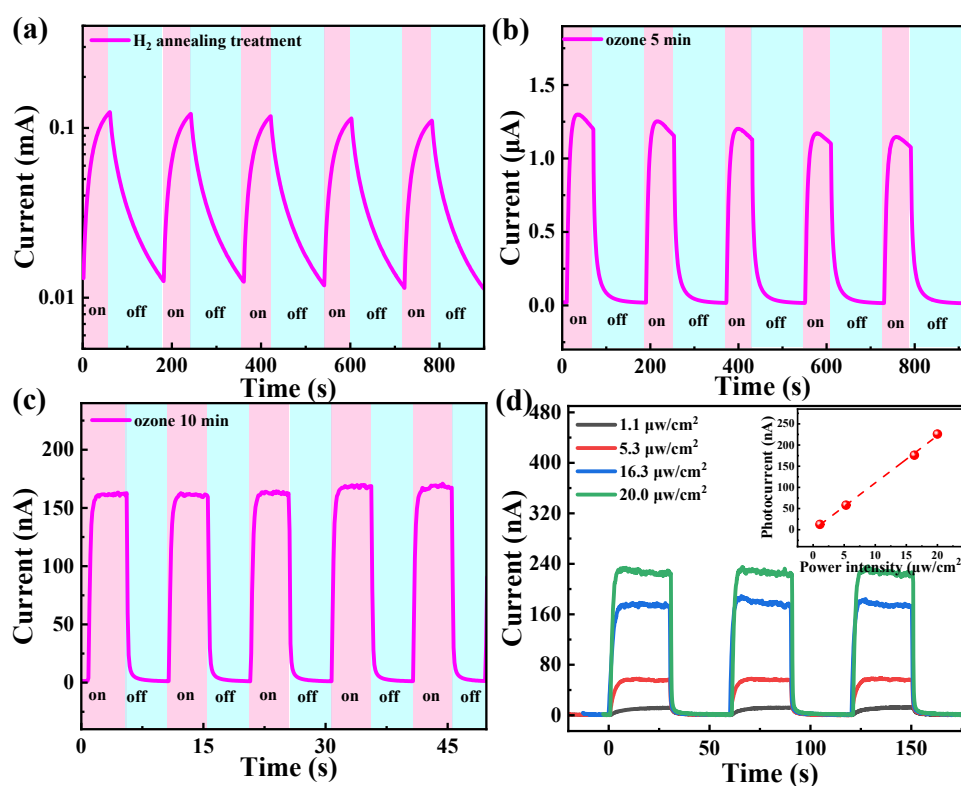

Figure S2. Photo stability of PDs. (a) H<sub>2</sub>-annealed, (b) Ozone 5 min (c) Ozone 10 min. (d) Time-dependent photo-response of the 10 min ozone treated PD under different light power intensity.

The time-dependent photoresponse of the PDs have been measured, as shown in Figure S2. It can be seen that the PDs' current rise and fall as the light source is turned on and off. After multiple cycle tests, the PD's photoresponse did not decay, indicating that the PDs have excellent stability. Furthermore, as the incident light energy density increases, the photocurrent shows a linear upward trend.
